# Supplementary material for: Simultaneous determination of guanine and adenine in the presence of uric acid by a poly(para toluene sulfonic acid) mediated electrochemical sensor in alkaline medium
Source: Royal Society of Chemistry journal article supplement (doi:10.1039/c6ra13567f), 2016-01-01
Supplement: c6ra13567f1.pdf [file c6ra13567f1.pdf]

### Supplementary information

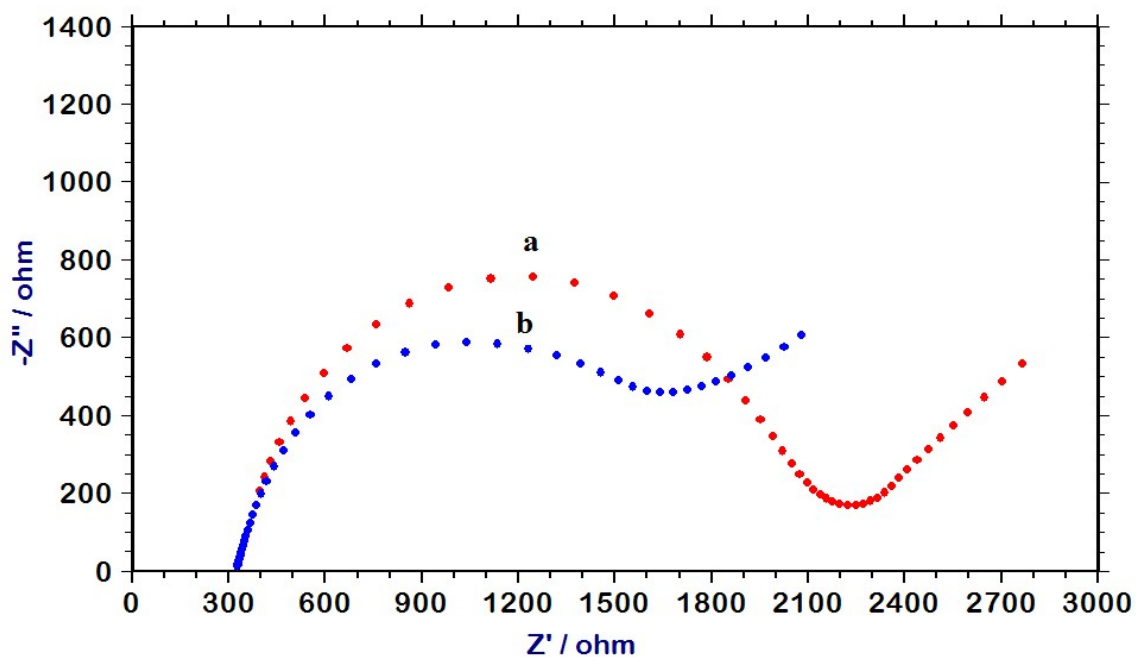

**Fig.1.** Overlay of Nyquist plots of (a) bare GCE (b) *p*-PTSA GCE in 5 mM  $[\text{Fe}(\text{CN})_6]^{3-/4-}$  in 0.1 M KCl at a frequency range 0.1 -  $10^5$  Hz

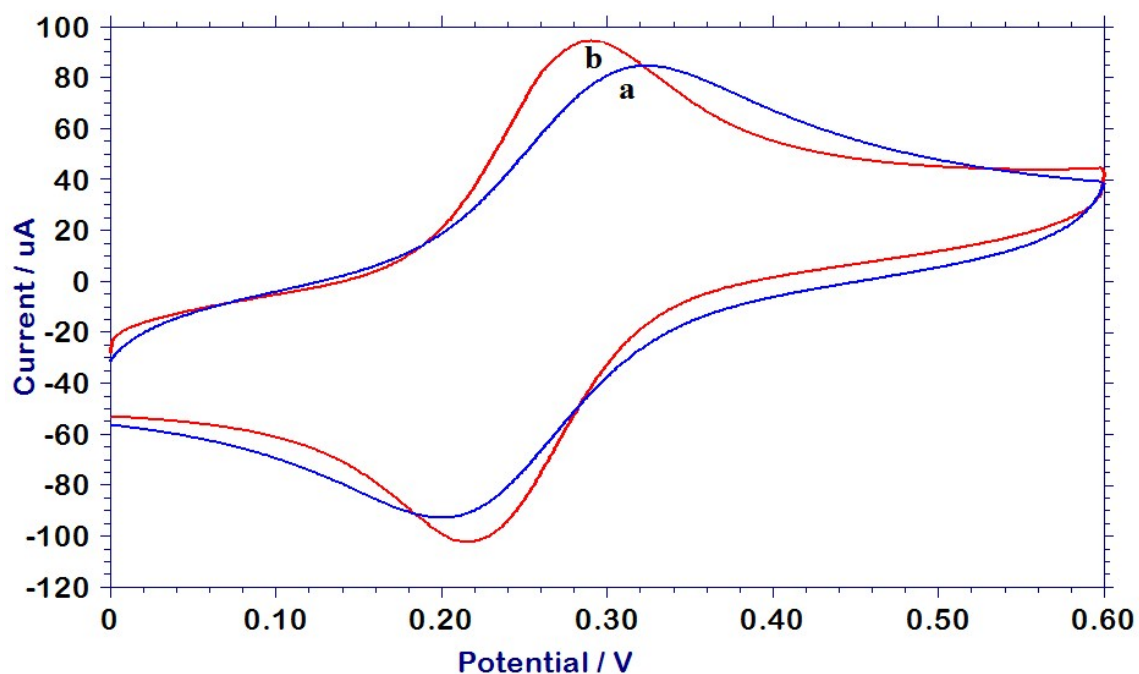

**Fig. 2.** Overlay of CV of (a) bare GCE (b) *p*-PTSA GCE in 2 mM  $\text{K}_4[\text{Fe}(\text{CN})_6]$  in 0.1 M  $\text{KNO}_3$  at  $100 \text{ mV s}^{-1}$

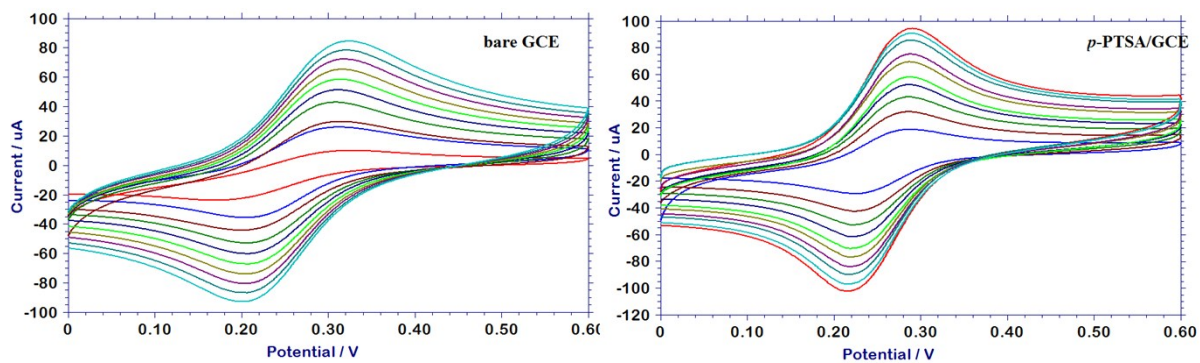

**Fig. 3.** Overlay of CV obtained in 2 mM  $K_4[Fe(CN)_6]$  in 0.1 M  $KNO_3$  at scan rates ranging from  $10 \text{ mV s}^{-1}$  to  $100 \text{ mV s}^{-1}$

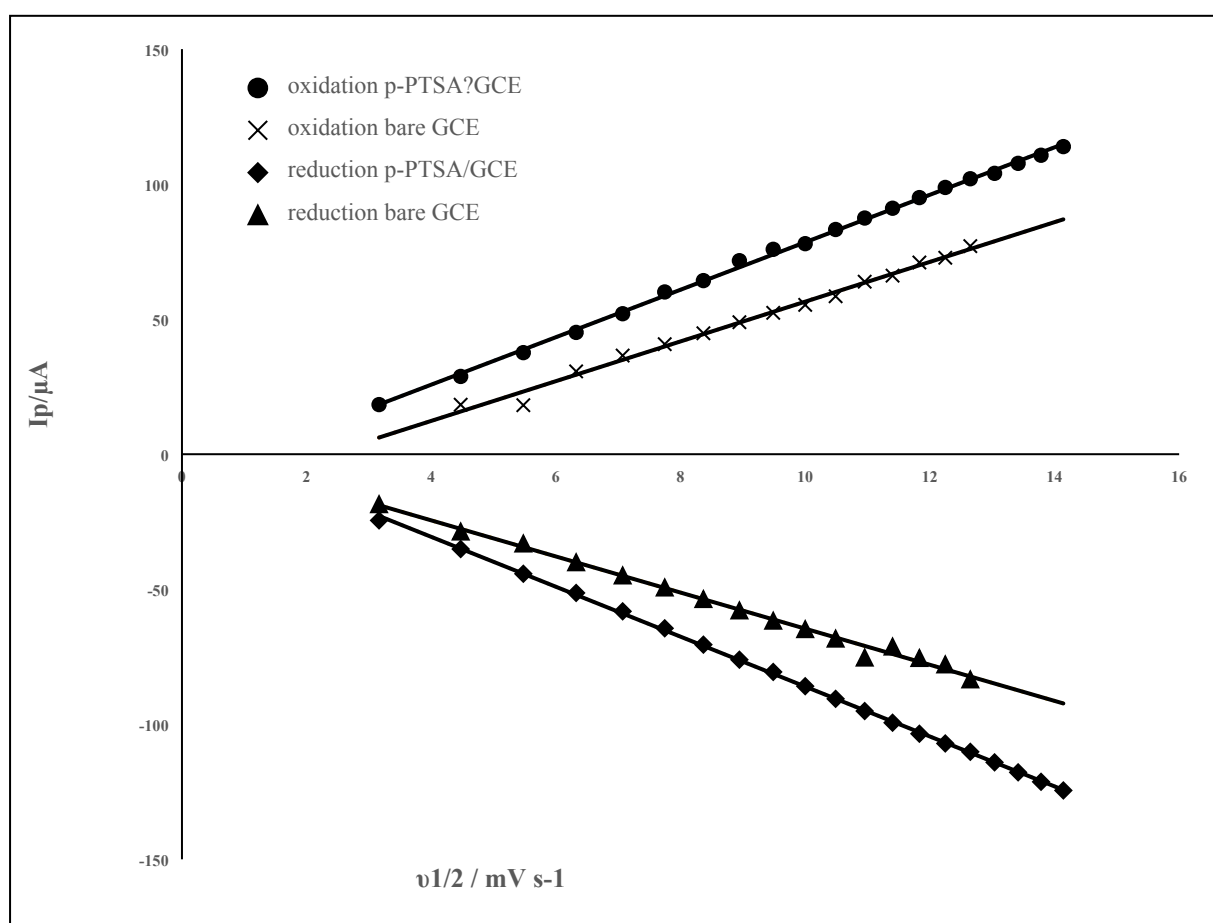

**Fig. 4.** Variation of peak current with square root of scan rate in the range  $10 \text{ mV s}^{-1}$ -  $200 \text{ mV s}^{-1}$

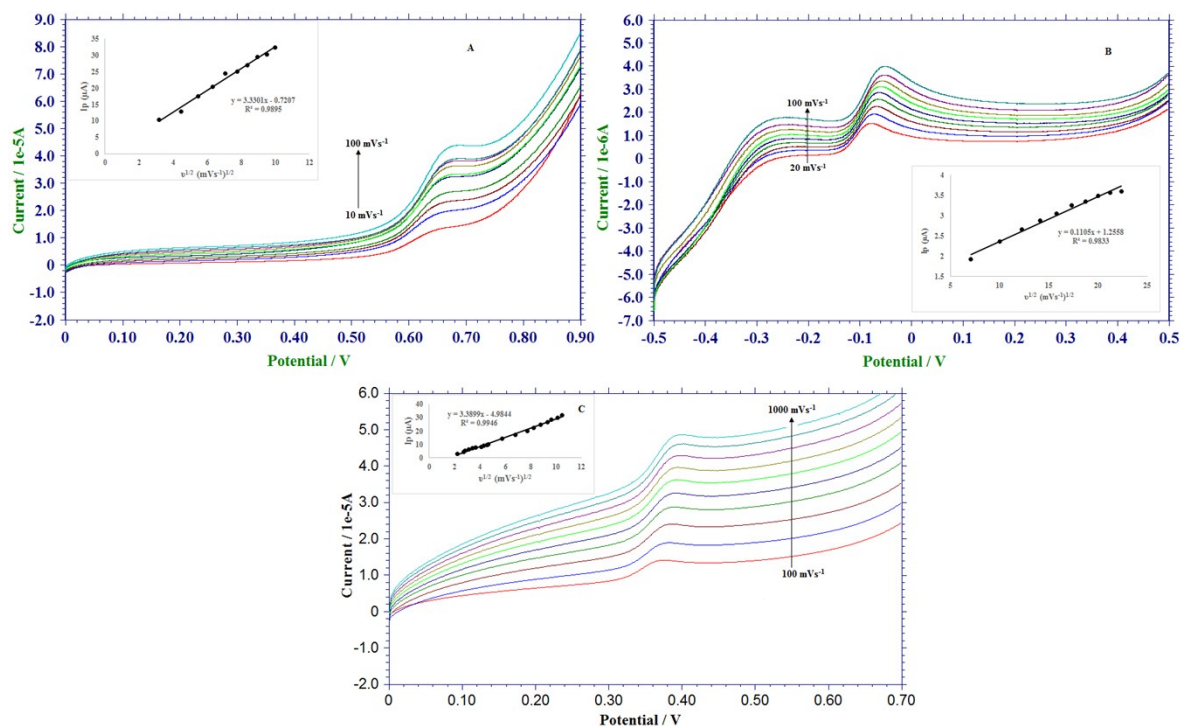

**Fig. 5.** Overlay of LSV of a solution of 0.1 M NaOH containing 500  $\mu\text{M}$  of (A) Adenine (B) Uric Acid and (C) Guanine on *p*-PTSA GCE. Inset of each overlay shows the plot of peak current vs square root of scan rate

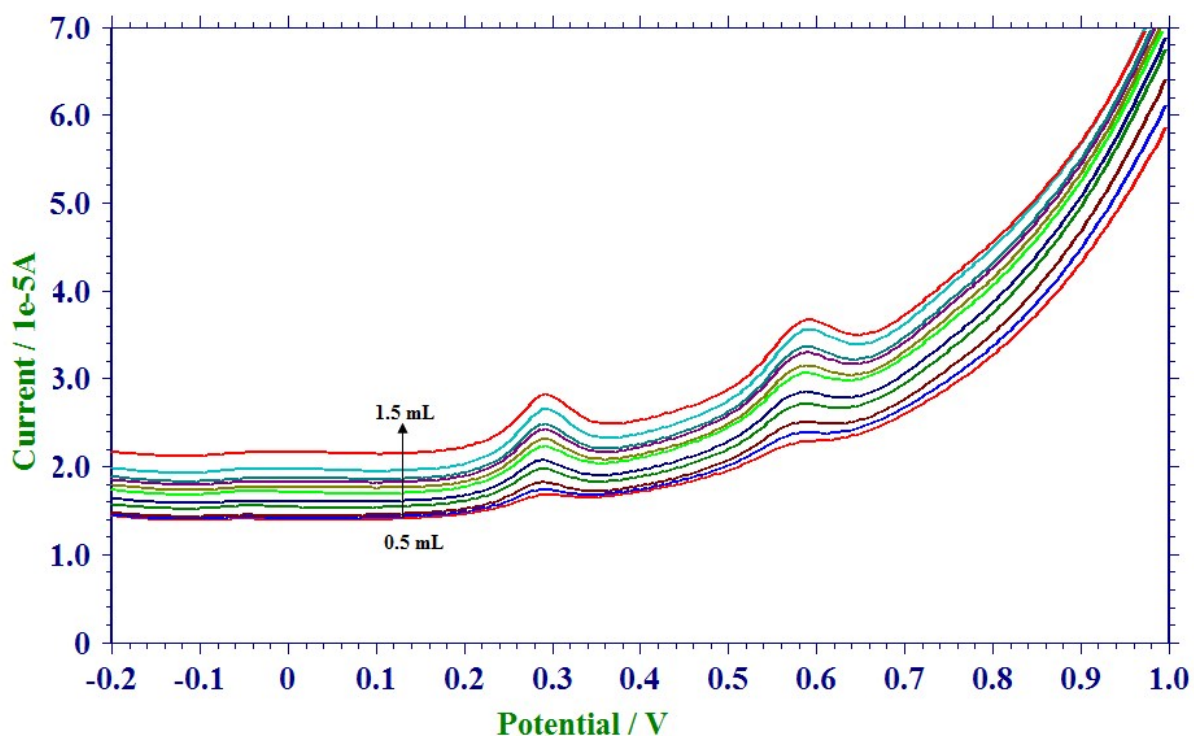

**Fig.6.** Overlay of SWV of 0.5 mL to 1.5 mL of 0.14  $\text{mg mL}^{-1}$  of acid denatured HS DNA in 0.1 M NaOH obtained on *p*-PTSA/GCE.

| Analyte                                        | Linear Range                            | Regression equation                                 | $R^2$  | LOD $\mu\text{M}$ |
|------------------------------------------------|-----------------------------------------|-----------------------------------------------------|--------|-------------------|
| G                                              | 3 $\mu\text{M}$ to 10 $\mu\text{M}$     | $I_p (\mu\text{A}) = - 8.09 + 3.95 C (\mu\text{M})$ | 0.9913 | 0.0079            |
|                                                | 10 $\mu\text{M}$ to 300 $\mu\text{M}$   | $I_p (\mu\text{A}) = + 28.5 + 0.76 C (\mu\text{M})$ | 0.9972 |                   |
| A                                              | 5 $\mu\text{M}$ to 45 $\mu\text{M}$     | $I_p (\mu\text{A}) = - 0.10 + 0.05 C (\mu\text{M})$ | 0.9934 | 0.94              |
|                                                | 50 $\mu\text{M}$ to 1500 $\mu\text{M}$  | $I_p (\mu\text{A}) = - 3.16 + 0.12 C (\mu\text{M})$ | 0.9969 |                   |
| UA                                             | 20 $\mu\text{M}$ to 100 $\mu\text{M}$   | $I_p (\mu\text{A}) = - 1.12 + 0.08 C (\mu\text{M})$ | 0.9962 | 3.31              |
|                                                | 90 $\mu\text{M}$ to 1500 $\mu\text{M}$  | $I_p (\mu\text{A}) = +6.34 + 0.02 C (\mu\text{M})$  | 0.9941 |                   |
| G                                              | 20 $\mu\text{M}$ to 200 $\mu\text{M}$   | $I_p (\mu\text{A}) = +0.42 + 0.10 C (\mu\text{M})$  | 0.9985 | 3.08              |
| (in presence of 100 $\mu\text{M}$ of A and UA) | 250 $\mu\text{M}$ to 1000 $\mu\text{M}$ | $I_p (\mu\text{A}) = +10.7 + 0.04 C (\mu\text{M})$  | 0.9923 |                   |
| A                                              | 10 $\mu\text{M}$ to 120 $\mu\text{M}$   | $I_p (\mu\text{A}) = - 0.13 + 0.05 C (\mu\text{M})$ | 0.9950 | 3.16              |
| (in presence of 50 $\mu\text{M}$ of G and UA)  |                                         |                                                     |        |                   |
| UA                                             | 20 $\mu\text{M}$ -110 $\mu\text{M}$     | $I_p (\mu\text{A}) = + 0.64 + 0.06 C (\mu\text{M})$ | 0.9974 | 7.49              |
| (in presence of 100 $\mu\text{M}$ of G and A)  | 100 $\mu\text{M}$ - 1000 $\mu\text{M}$  | $I_p (\mu\text{A}) = + 3.35 + 0.03 C (\mu\text{M})$ | 0.9902 |                   |

**Table 1.** Statistical parameters for determination of the analytes

| Electrode                         | Technique | Analyte | $E_p$ (mV) | Linear range ( $\mu\text{M}$ ) | LOD ( $\mu\text{M}$ ) | Reference |
|-----------------------------------|-----------|---------|------------|--------------------------------|-----------------------|-----------|
| Ag-PMel/GCE                       | SWV       | G       | 850        | 0.1–50                         | .008                  | 5         |
|                                   |           | A       | 1100       | 0.1–60                         | .008                  |           |
|                                   |           | UA      | 450        | 0.1–50                         | 0.1                   |           |
| PMel/GCE                          | SWV       | G       | 840        | 0.1-50                         | .08                   | 24        |
|                                   |           | A       | 1152       | 0.1-60                         | .07                   |           |
| nano-Au/DNA/nano-Au/poly(SFR)/GCE | DPV       | G       | 520        | 0.009–5.0                      | 0.0005                | 6         |
|                                   |           | A       | 900        | 0.06–0.8                       | .004                  |           |
|                                   |           | UA      | 320        | 0.09–12                        | .008                  |           |
| PIlox–GO/GCE                      | DPV       | G       | 880        | 3.3–103.3                      | 0.48                  | 12        |
|                                   |           | A       | 1200       | 9.6–215                        | 1.28                  |           |
|                                   |           | UA      | 530        | 3.6–249.6                      | 0.59                  |           |
| PANI/MnO <sub>2</sub> /GCE        | DPV       | G       | 610        | 10–100                         | 4.8                   | 22        |
|                                   |           | A       | 880        | 10–100                         | 2.9                   |           |
| <i>p</i> -PTSA/GCE                | SWV       | G       | 304        | 10-100                         | 0.35                  | This work |
|                                   |           | A       | 608        | 20-100                         | 0.78                  |           |
|                                   |           | UA      | -108       | 10-100                         | 5.88                  |           |

**Table 2.** Comparison of the developed sensor with other recent polymer modified sensors based on GCE

| Species           | Concentration<br>$\mu\text{M}$ | Signal change (%) |                 |                 |
|-------------------|--------------------------------|-------------------|-----------------|-----------------|
|                   |                                | Guanine           | Adenine         | Uric Acid       |
| Cytosine          | 10                             | -1.1              | -4.3            | -2.5            |
| Thymine           | 50                             | -2.0              | -17.0           | -4.9            |
| Uracil            | 10                             | -0.1              | -3.4            | -4.5            |
| Homovanillic Acid | 50                             | -1.3              | -10.0           | -4.7            |
| Dopamine          | 100                            | -6.8              | -3.7            | -2.9            |
| Serotonin         | 10                             | > +20             | -5.4            | >+20            |
| Melatonin         | 10                             | > +20             | Peak disappears | Peak disappears |
| Glutathione       | 10                             | -0.8              | -4.0            | -4.3            |
| Ascorbic Acid     | 50                             | -3.4              | -8.3            | Peak disappears |
| K <sup>+</sup>    | 10                             | -1.3              | +1.4            | -9.9            |
| Ca <sup>+</sup>   | 10                             | +8.4              | -1.3            | -6.4            |

**Table 3.** Signal change produced by possibly co-existing species on the simultaneous determination of 10  $\mu\text{M}$  G, A and UA
